# Supplementary material for: Reductive Amination Reaction for the Functionalization of Cellulose Nanocrystals
Source: MDPI journal article supplement (doi:10.3390/molecules26165032), 2021-08-19
Supplement: s1 [file s1]

Supplementary Material

# Reductive Amination Reaction for the Functionalization of Cellulose Nanocrystals

Omar Hassan Omar <sup>1</sup>, Rosa Giannelli <sup>2</sup>, Erica Colaprico, <sup>2</sup> Laura Capodiecici, <sup>3</sup> Francesco Babudri, <sup>2</sup> and Alessandra Operamolla <sup>4,\*</sup>

<sup>1</sup> CNR-ICCOM Istituto di Chimica dei Composti Organometallici, Via Edoardo Orabona 4, 70126 Bari, Italy; hassan@ba.iccom.cnr.it

<sup>2</sup> Dipartimento di Chimica, Università degli Studi di Bari Aldo Moro, Via Edoardo Orabona 4, 70126 Bari, Italy; [francesco.babudri@uniba.it](mailto:francesco.babudri@uniba.it)

<sup>3</sup> ENEA – Italian National Agency for New Technologies, Energy and Sustainable Economic Development, Laboratory for Functional Materials and Technologies for Sustainable Applications (SSPT-PROMAS-MATAS), S.S. 7 “Appia” km 706, I-72100 Brindisi (Br), Italy; [laura.capodiecici@enea.it](mailto:laura.capodiecici@enea.it)

<sup>4</sup> Dipartimento di Chimica e Chimica Industriale, Università di Pisa, Via Giuseppe Moruzzi 13, 56124 Pisa, Italy

\* Correspondence: [alessandra.operamolla@unipi.it](mailto:alessandra.operamolla@unipi.it); Tel.: 0039 050 2219342.

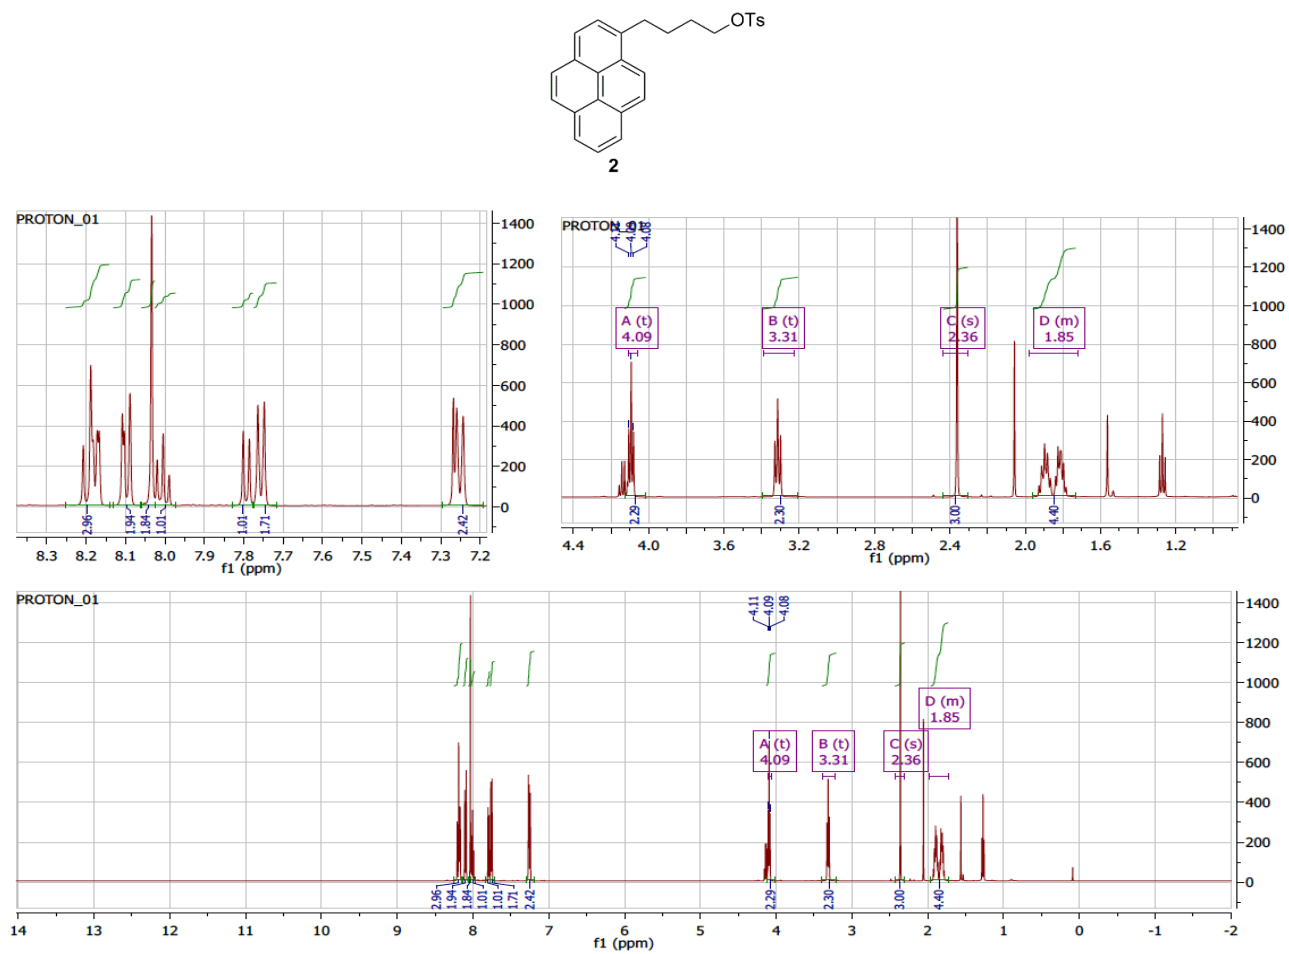

**Figure S1.** <sup>1</sup>H-NMR spectrum of 4-(1-pyrenyl)butyl tosylate **2** in CDCl<sub>3</sub>.

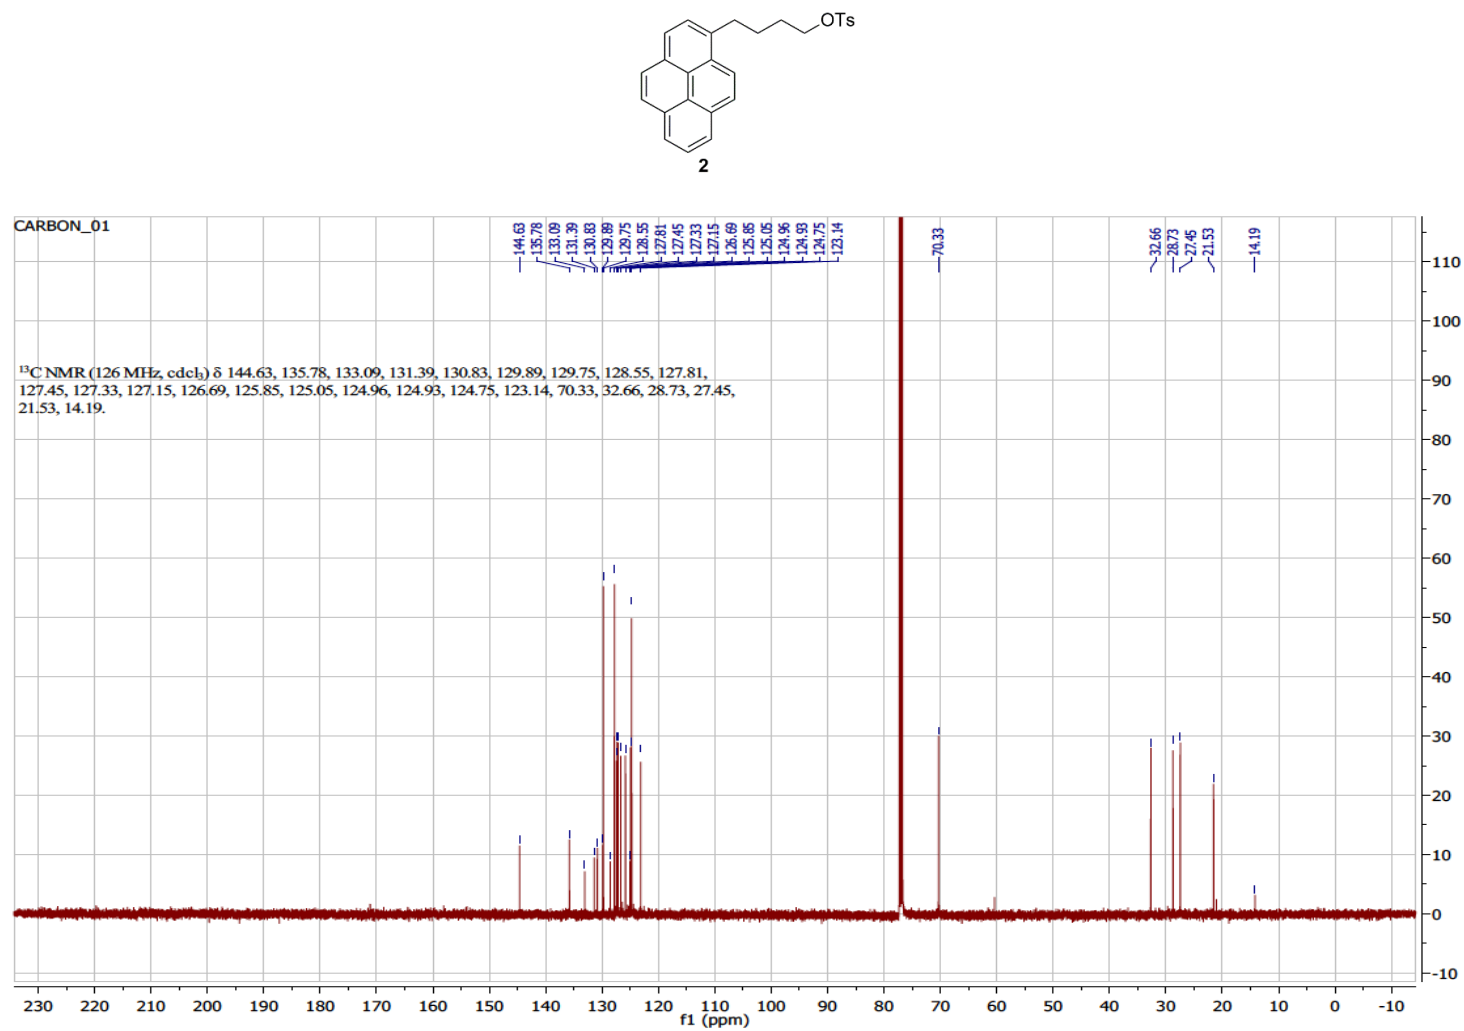

**Figure S2.**  $^{13}\text{C}$ -NMR spectrum of 4-(1-pyrenyl)butyl tosylate **2** in  $\text{CDCl}_3$ .

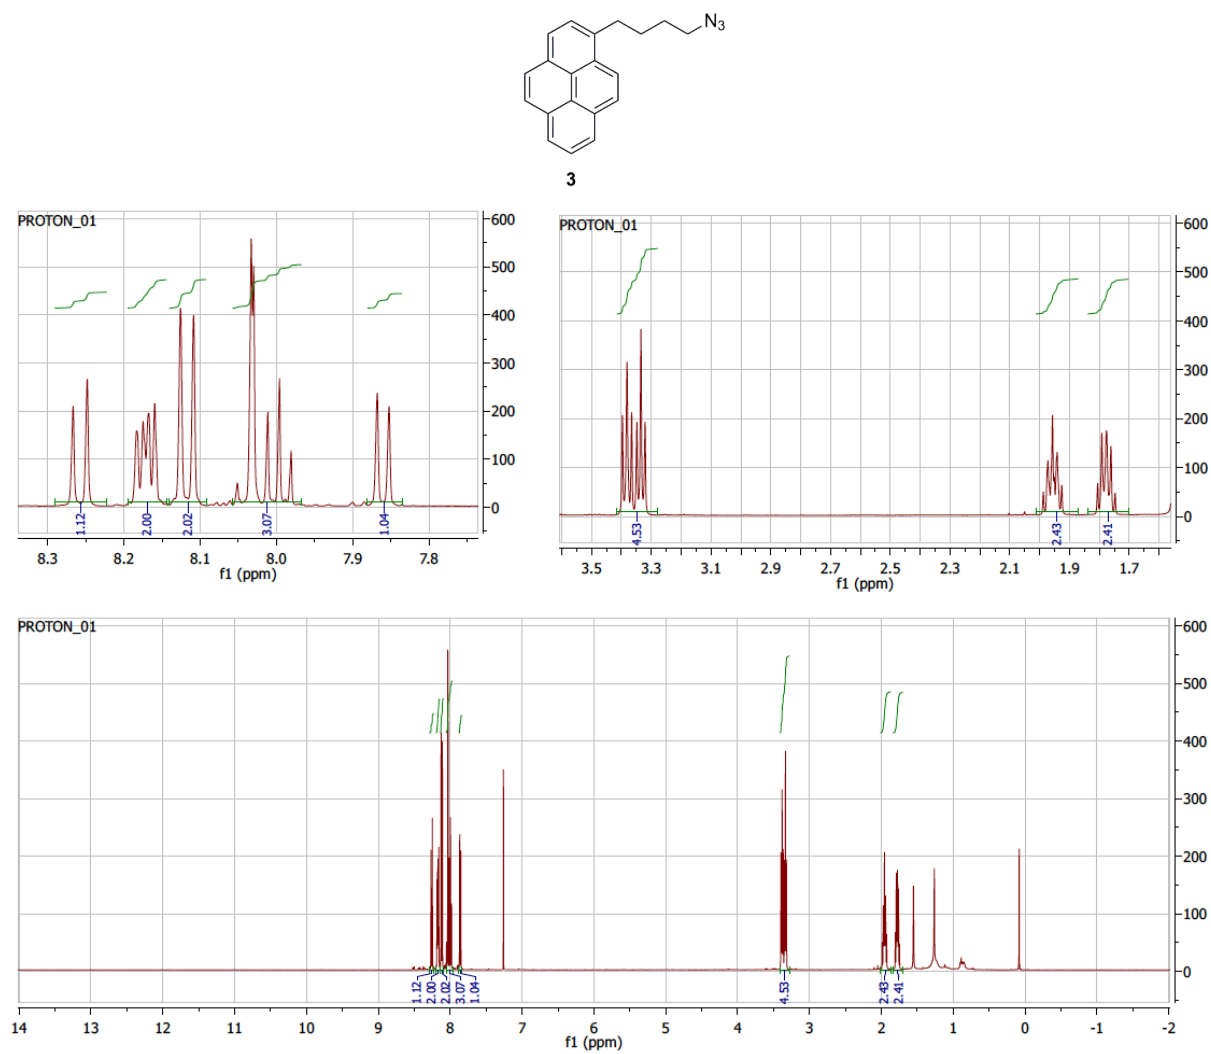

**Figure S3.**  $^1\text{H}$ -NMR spectrum of 1-(4-azidobutyl)pyrene **3** in  $\text{CDCl}_3$ .

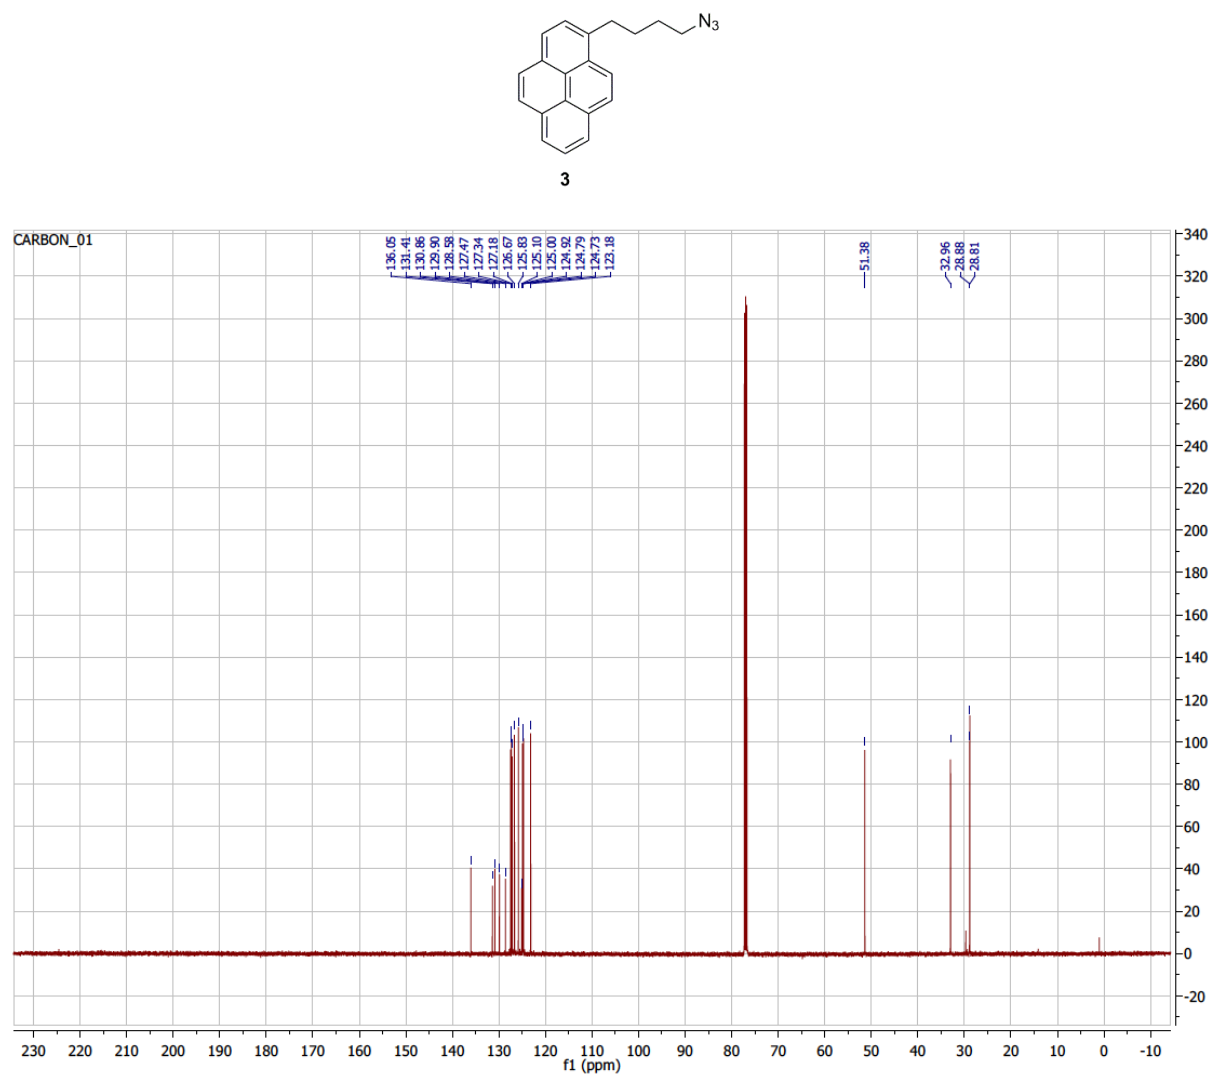

**Figure S4.**  $^{13}\text{C}$ -NMR spectrum of 1-(4-azidobutyl)pyrene **3** in  $\text{CDCl}_3$ .

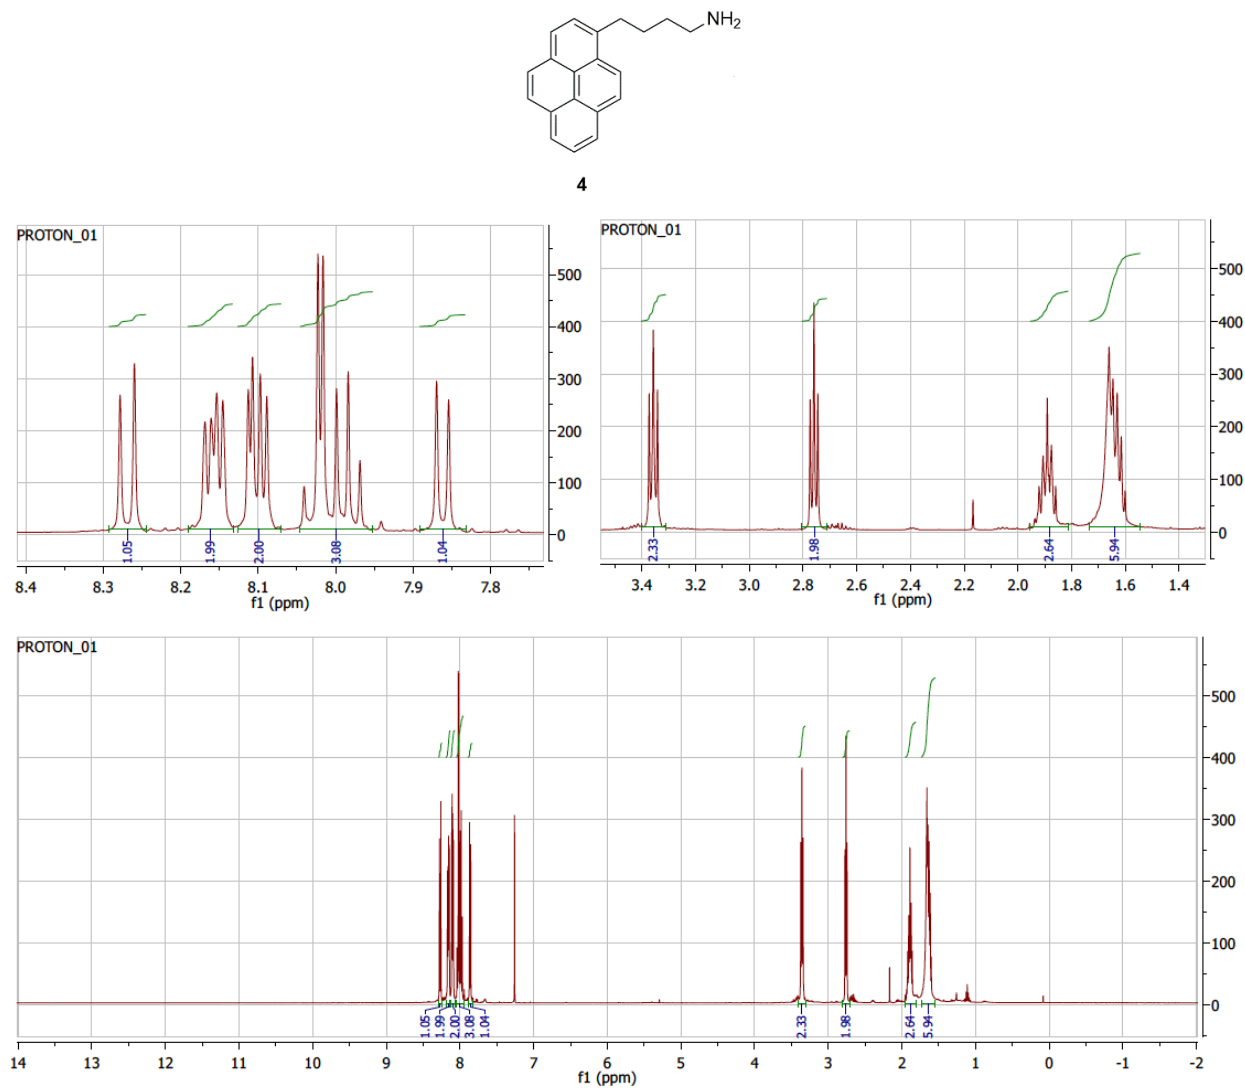

**Figure S5.**  $^1\text{H}$ -NMR spectrum of 4-(1-pyrenyl)butanamine **4** in  $\text{CDCl}_3$ .

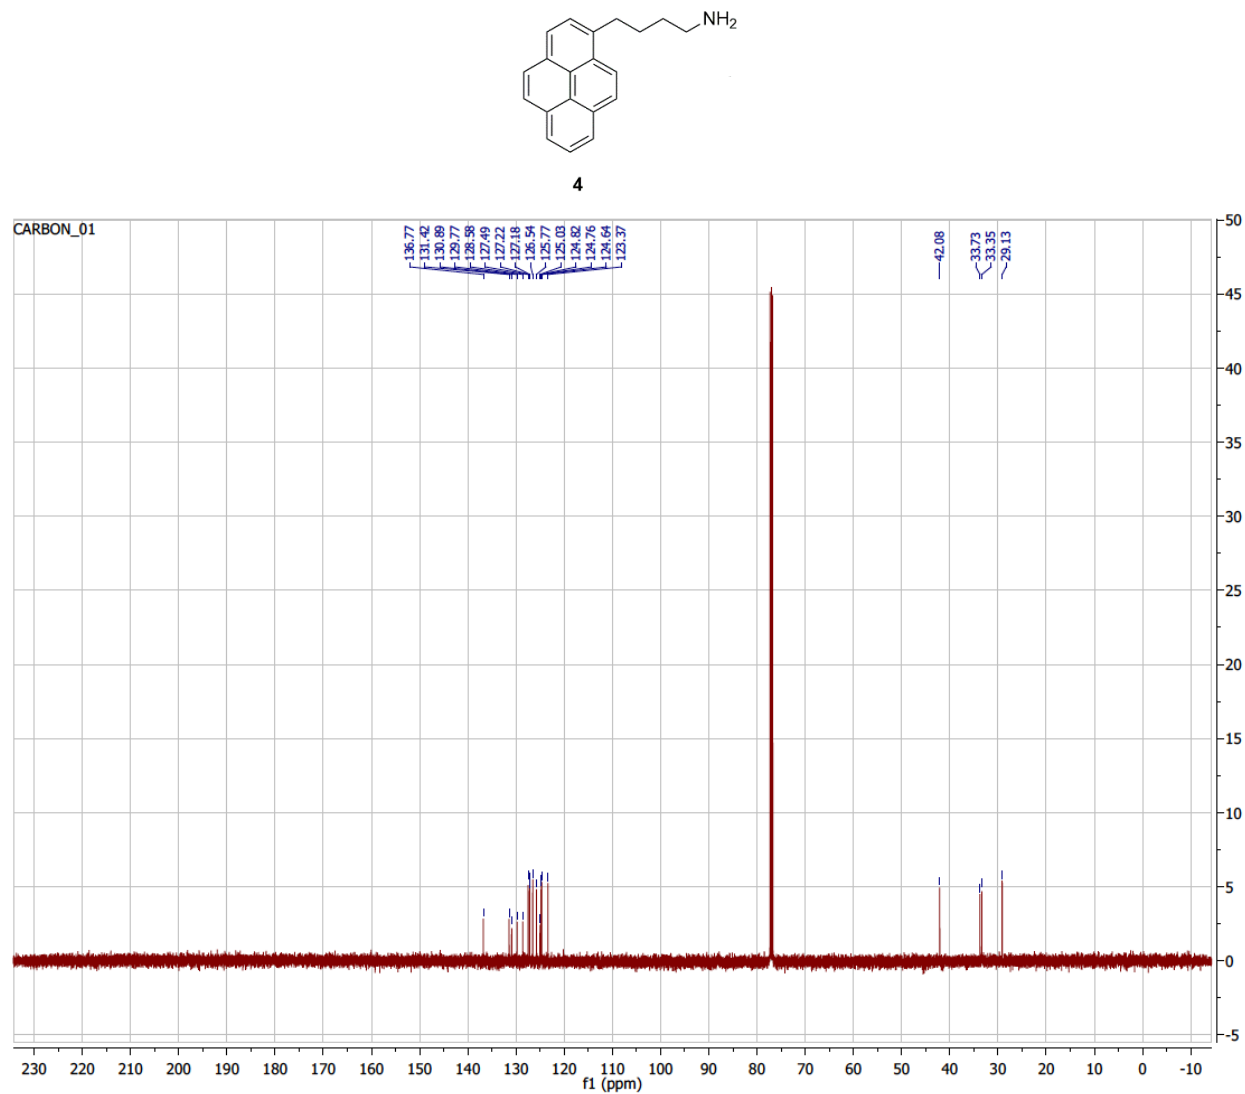

**Figure S6.**  $^{13}\text{C}$ -NMR spectrum of 4-(1-pyrenyl)butanamine **4** in  $\text{CDCl}_3$ .

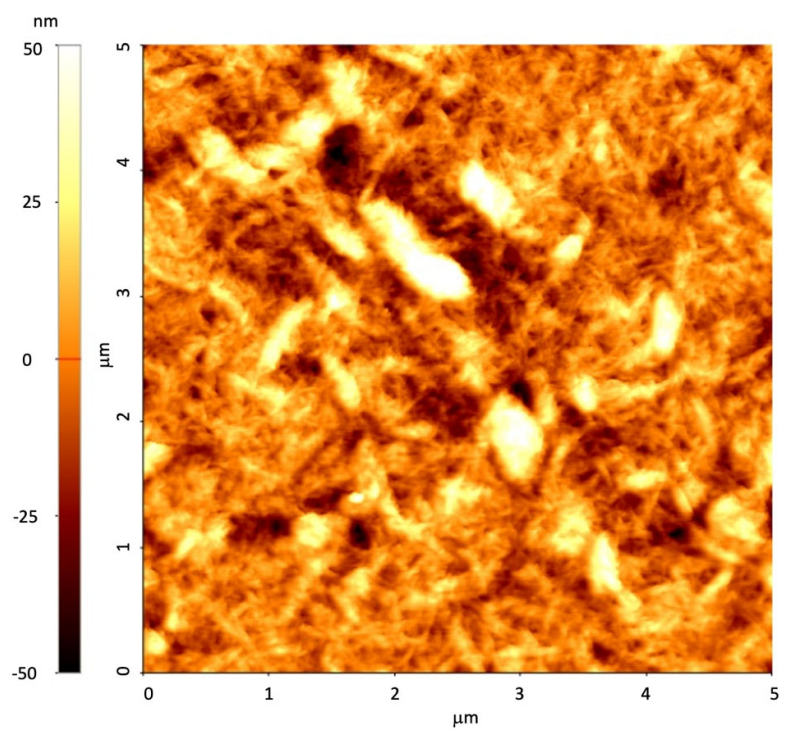

**Figure S7.** AFM 5x5 μm<sup>2</sup> topography recorded on a film of Pyrene modified S\_CNC 7a deposited on quartz from water.

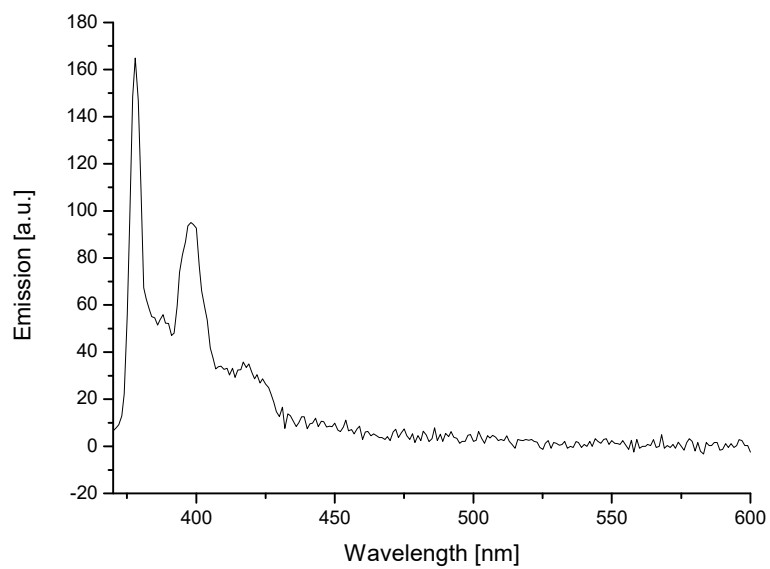

**Figure S8.** 4-(1-pyrenyl)butanamine 4 emission spectrum in water.



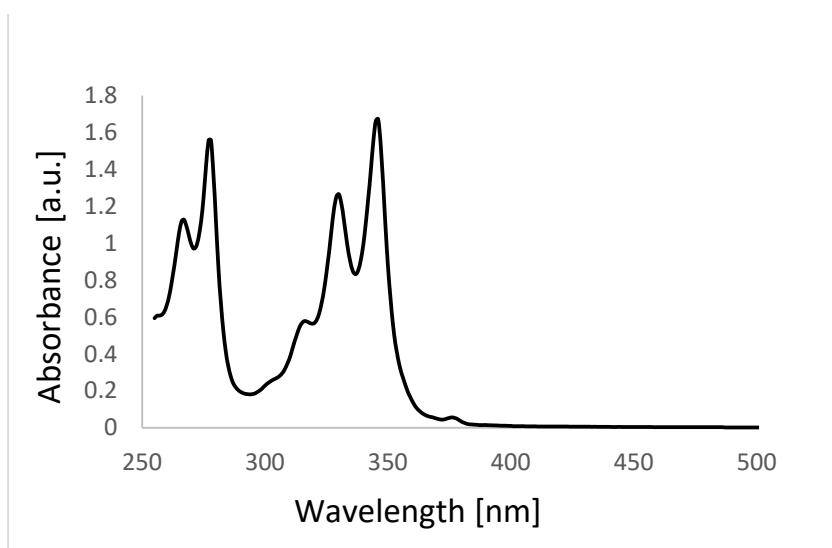

Figure S9. 4-(1-pyrenyl)butanamine **4** UV-vis absorption spectrum in DMSO.

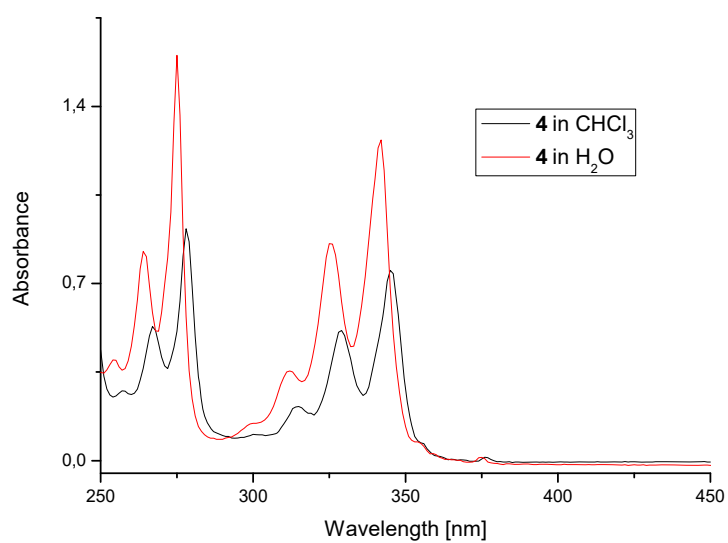

Figure S10. 4-(1-pyrenyl)butanamine **4** UV-vis absorption spectra in  $\text{CHCl}_3$  and water.

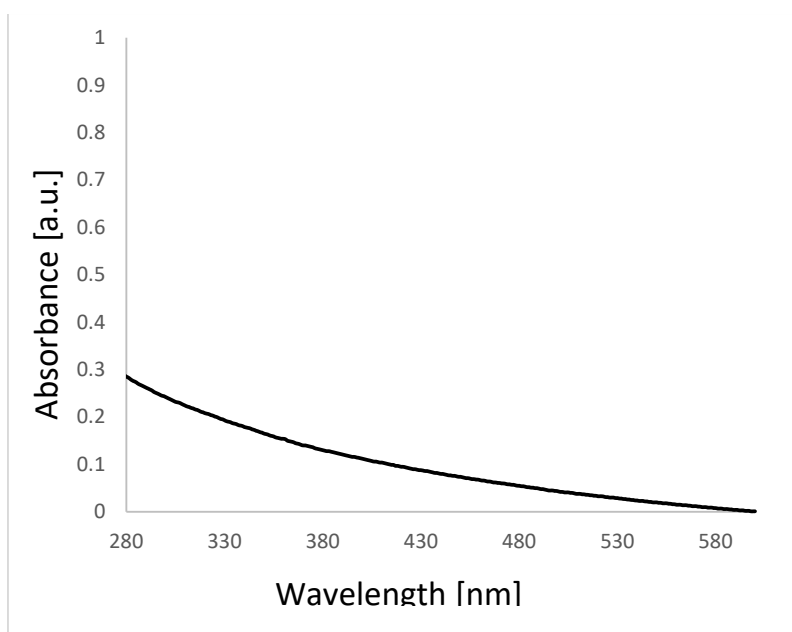

**Figure S11.** S\_CNC UV-vis 5a absorption spectrum in DMSO.

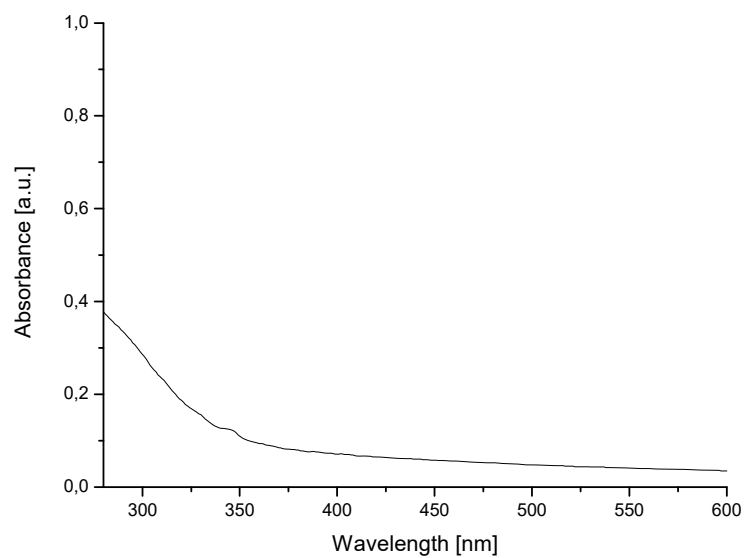

**Figure S12.** Pyrene modified S\_CNC 7a UV-vis absorption spectrum in DMSO.
